# Supplementary material for: The Fatty Acid Species and Quantity Consumed by the Breastfed Infant Are Important for Growth and Development
Source: MDPI journal article supplement (doi:10.3390/nu13114183), 2021-11-22
Supplement: s1 [file s1]

# **The fatty acid species and quantity consumed by the breastfed infant are important for growth and development**

## **Supplementary material**

|                                                                                                                                           |        |
|-------------------------------------------------------------------------------------------------------------------------------------------|--------|
| Supplementary Table S1. Sampling, measurement and data collection timing protocol                                                         | Page 1 |
| Supplementary Table S2. Maternal food frequency in the month prior to sample collection                                                   | Page 2 |
| Supplementary Table S3. Fatty acids identified, naming conventions and percent of total (46 fatty acids) throughout lactation             | Page 3 |
| Supplementary Table S4. Significant relationships between human milk fatty acids and maternal intake frequency for eggs, nuts and avocado | Page 6 |
| Supplementary Table S5. Infant fatty acid intake (mg/day) for exclusively breastfeeding infants from months one to six of lactation       | Page 7 |

**Supplementary Table S1. Sampling, measurement and data collection protocol**

| Collection                                                                  | Month |   |   |   |   |   |   |
|-----------------------------------------------------------------------------|-------|---|---|---|---|---|---|
|                                                                             | 0     | 1 | 2 | 3 | 4 | 5 | 6 |
| Infant weight, length and head circumference                                | x     | x | x | x | x | x | x |
| Maternal weight and height                                                  |       | x | x | x | x | x | x |
| Maternal food frequency questionnaire                                       |       | x | x | x | x | x | x |
| Pre-feed milk samples, from feeding breast (morning, afternoon and evening) |       | x | x | x | x | x | x |
| Infant milk intake                                                          |       |   |   | x |   |   |   |
| Pre- and post-feed milk samples for 24 hours                                |       |   |   | x |   |   |   |
| Infant growth, health and development questionnaire                         | x     | x | x | x | x | x | x |

**Supplementary Table S2. Maternal food frequency in the month prior to sample collection.** Monthly frequency numbers were allocated as: never (0), ≤once per week (1), between one and three times per week (2), between four and six times per week (3) and every day (4). Results are presented as mean±SD

|                | OLIVE/CANOLA OIL | COCONUT OIL | FISH    | RED MEAT/CHICKEN | EGGS    | NUTS    | AVOCADO | DHA-CONTAINING SUPPLEMENTS |
|----------------|------------------|-------------|---------|------------------|---------|---------|---------|----------------------------|
| <b>Month 1</b> | 3.6±1.3          | 1.6±2.0     | 1.3±0.7 | 3.4±0.7          | 2.5±1.2 | 2.4±1.5 | 2.2±1.2 | 2.5±2.0                    |
| <b>Month 2</b> | 3.6±1.3          | 1.7±2.0     | 1.3±0.7 | 3.3±0.7          | 2.3±1.2 | 2.3±1.3 | 2.3±1.3 | 2.3±2.0                    |
| <b>Month 3</b> | 3.6±1.3          | 1.8±2.1     | 1.4±0.7 | 3.4±0.7          | 2.4±1.1 | 2.1±1.4 | 2.1±1.2 | 2.4±1.9                    |
| <b>Month 4</b> | 3.6±1.3          | 1.8±2.1     | 1.4±0.7 | 3.4±0.7          | 2.3±1.1 | 1.9±1.3 | 2.3±1.2 | 2.1±2.0                    |
| <b>Month 5</b> | 3.6±1.3          | 1.6±2.0     | 1.3±0.7 | 3.4±0.7          | 2.5±1.2 | 2±1.3   | 2.2±1.2 | 2.5±2.0                    |
| <b>Month 6</b> | 3.6±1.3          | 1.6±2.0     | 1.3±0.7 | 3.4±0.7          | 2.6±1.2 | 2.1±1.4 | 2.2±1.3 | 2.3±2.0                    |

**Supplementary Table S3. Fatty acids identified, naming conventions and percent of total (46 fatty acids) throughout lactation.** Results are listed monthly as mean±SD and median (Q1, Q3).

| Formula | Fame identity                | Month 1                                | Month 2                                | Month 3                                | Month 4                                | Month 5                                | Month 6                              | RSD   |
|---------|------------------------------|----------------------------------------|----------------------------------------|----------------------------------------|----------------------------------------|----------------------------------------|--------------------------------------|-------|
| C6:0    | Methyl hexanoate             | 0.012±0.007<br>0.010 (0.010,0.010)     | 0.013±0.006<br>0.010 (0.010,0.010)     | 0.011±0.004<br>0.010 (0.010,0.010)     | 0.013±0.005<br>0.015 (0.011,0.021)     | 0.017±0.015<br>0.01 (0.01,0.013)       | 0.015±0.012<br>0.01 (0.01,0.019)     | 67.25 |
| C8:0    | Methyl octanoate             | 0.161±0.104<br>0.110 (0.014,0.199)     | 0.133±0.084<br>0.227 (0.107,0.289)     | 0.138±0.124<br>0.139 (0.081,0.265)     | 0.144±0.102<br>0.147 (0.096,0.206)     | 0.146±0.100<br>0.108 (0.071,0.148)     | 0.151±0.117<br>0.080 (0.036,0.158)   | 71.35 |
| C10:0   | Methyl decanoate             | 1.673±0.524<br>1.492 (1.324,1.597)     | 1.533±0.251<br>1.670 (1.541,1.949)     | 1.603±0.452<br>1.897 (1.483,2.205)     | 1.653±0.374<br>1.679 (1.250,1.905)     | 1.605±0.376<br>1.334 (1.235,1.443)     | 1.615±0.572<br>1.493 (1.284,1.660)   | 26.65 |
| C11:0   | Methyl undecanoate           | 0.010±0.000<br>0.010 (0.010,0.010)     | 0.010±0.000<br>0.010 (0.010,0.010)     | 0.010±0.000<br>0.010 (0.010,0.010)     | 0.010±0.010<br>(0.010,0.010)           | 0.01±0.00<br>0.010 (0.01,0.01)         | 0.01±0<br>0.010 (0.01,0.01)          | 0.00  |
| C12:0   | Methyl dodecanoate           | 4.678±1.719<br>4.507 (3.959,5.888)     | 4.17±1.138<br>4.619 (3.437,5.109)      | 4.294±1.533<br>4.599 (3.976,5.999)     | 4.657±1.325<br>5.762 (3.327,6.577)     | 4.482±1.611<br>3.848 (3.187,4.95)      | 5.26±1.661<br>4.292 (3.831,4.955)    | 33.06 |
| C13:0   | Methyl tridecanoate          | 0.010±0.001<br>0.010 (0.010,0.010)     | 0.010±0.001<br>0.010 (0.010,0.010)     | 0.010±0.001<br>0.010 (0.010,0.010)     | 0.010±0.000<br>0.010 (0.010,0.010)     | 0.01±0<br>0.01 (0.01,0.01)             | 0.001±0.000<br>0.010 (0.01,0.01)     | 9.23  |
| C14:0   | Methyl tetradecanoate        | 5.619±2.117<br>5.939 (5.375,7.139)     | 5.266±1.648<br>4.868 (4.175,5.432)     | 4.916±1.47<br>4.467 (3.241,6.477)      | 5.198±1.420<br>5.611 (2.931,6.267)     | 5.621±1.846<br>5.104 (4.724,6.607)     | 5.895±1.663<br>5.541 (4.885,6.795)   | 31.4  |
| C15:0   | Methyl pentadecanoate        | 0.356±0.179<br>0.325 (0.279,0.425)     | 0.369±0.156<br>0.230 (0.216,0.326)     | 0.352±0.122<br>0.213 (0.176,0.44)      | 0.332±0.136<br>0.238 (0.157,0.443)     | 0.343±0.15<br>0.481 (0.440,0.545)      | 0.281±0.14<br>0.406 (0.333,0.478)    | 43.62 |
| C14:1   | Methyl myristoleate          | 0.274±0.172<br>0.208 (0.118,0.262)     | 0.236±0.123<br>0.163 (0.128,0.203)     | 0.236±0.107<br>0.113 (0.073,0.333)     | 0.223±0.104<br>0.162 (0.078,0.372)     | 0.26±0.177<br>0.336 (0.293,0.369)      | 0.208±0.131<br>0.324 (0.254,0.355)   | 57.27 |
| C16:0   | Methyl palmitate             | 21.801±3.530<br>22.278 (21.705,23.163) | 22.454±2.353<br>21.102 (20.195,22.662) | 21.669±2.566<br>23.428 (19.723,24.015) | 21.451±2.669<br>17.254 (15.977,19.906) | 21.672±3.387<br>24.088 (22.515,24.913) | 21.075±3.05<br>22.35 (21.834,24.063) | 13.45 |
| C15:1   | Methyl cis-10-pentadecenoate | 0.010±0.000<br>0.010 (0.010,0.010)     | 0.010±0.000<br>0.010 (0.010,0.010)     | 0.010±0.000<br>0.010 (0.010,0.010)     | 0.010±0.000<br>0.010 (0.010,0.010)     | 0.01±0.000<br>0.010 (0.010,0.010)      | 0.01±0.01 (0.01,0.01)                | 0.00  |
| C16:1   | Methyl 7-Hexadecenoate       | 0.478±0.136<br>0.406 (0.368,0.525)     | 0.421±0.129<br>0.369 (0.268,0.39)      | 0.417±0.107<br>0.328 (0.229,0.376)     | 0.492±0.283<br>0.458 (0.433,0.510)     | 0.453±0.114<br>0.506 (0.469,0.602)     | 0.369±0.132<br>0.501 (0.479,0.525)   | 37.29 |
| C17:0   | Methyl heptadecanoate        | 2.82±0.668<br>2.927 (2.698,3.316)      | 2.786±0.425<br>2.61 (2.353,2.751)      | 2.825±0.626<br>2.366 (2.244,3.019)     | 2.774±0.587<br>2.347 (1.983,3.017)     | 2.778±0.587<br>2.636 (2.549,3.084)     | 2.64±0.619<br>2.988 (2.735,3.35)     | 20.92 |
| C18:0   | Methyl octadecanoate         | 7.436±1.925<br>7.691 (7.017,9.502)     | 7.823±1.229<br>7.808 (6.674,8.549)     | 7.155±1.391<br>7.627 (6.465,8.157)     | 7.526±1.26<br>6.688 (5.857,8.095)      | 7.405±1.731<br>7.979 (7.149,8.364)     | 7.457±1.72<br>7.665 (6.159,8.031)    | 20.63 |

|                   |                                                                    |                                        |                                        |                                        |                                        |                                        |                                        |        |
|-------------------|--------------------------------------------------------------------|----------------------------------------|----------------------------------------|----------------------------------------|----------------------------------------|----------------------------------------|----------------------------------------|--------|
| C18:1n9t          | Methyl elaidate                                                    | 0.685±0.419<br>0.552 (0.313,0.838)     | 0.723±0.410<br>0.229 (0.18,0.584)      | 0.664±0.405<br>0.329 (0.247,0.53)      | 0.6±0.369<br>0.472 (0.306,0.827)       | 0.647±0.446<br>0.908 (0.793,1.191)     | 0.528±0.342<br>0.964 (0.663,1.178)     | 61.68  |
| C18:1n9c          | Cis-9-Octadecanoic acid                                            | 37.083±4.695<br>35.445 (33.706,38.914) | 36.691±3.430<br>38.243 (35.77,42.813)  | 38.303±3.382<br>38.541 (35.029,39.708) | 37.648±3.872<br>38.569 (34.175,43.212) | 37.526±3.794<br>35.813 (33.696,37.309) | 37.569±3.307<br>37.766 (35.532,39.741) | 9.93   |
| C18:1n7c          | 11-Octadecenoic acid                                               | 1.915±0.292<br>2.019 (1.396,2.204)     | 1.751±0.562<br>1.818 (1.663,1.952)     | 1.669±0.566<br>1.66 (1.473,2.021)      | 1.727±0.524<br>1.908 (1.767,2.049)     | 1.716±0.392<br>1.709 (1.239,1.997)     | 1.727±0.435<br>1.91 (1.648,2.096)      | 26.71  |
| C18:2n6t          | Methyl linolelaidate (trans-9, trans-12 octadecadienic acid)       | 0.073±0.049<br>0.043 (0.032,0.087)     | 0.070±0.050<br>0.010 (0.010,0.040)     | 0.069±0.043<br>0.034 (0.014,0.056)     | 0.068±0.045<br>0.061 (0.041,0.124)     | 0.078±0.053<br>0.115 (0.093,0.122)     | 0.061±0.039<br>0.116 (0.098,0.128)     | 65.76  |
| C18:2             | Cis-9, trans-12 octadecadienic acid                                | 0.087±0.077<br>0.037 (0.024,0.076)     | 0.083±0.058<br>0.010 (0.010,0.023)     | 0.073±0.056<br>0.043 (0.012,0.056)     | 0.069±0.053<br>0.056 (0.042,0.114)     | 0.078±0.084<br>0.108 (0.091,0.133)     | 0.063±0.051<br>0.136 (0.11,0.164)      | 84.07  |
| C20:0             | Methyl arachidate                                                  | 0.216±0.090<br>0.183 (0.13,0.261)      | 0.214±0.072<br>0.218 (0.184,0.312)     | 0.206±0.098<br>0.280 (0.253,0.303)     | 0.201±0.075<br>0.260 (0.204,0.289)     | 0.212±0.089<br>0.169 (0.156,0.182)     | 0.205±0.092<br>0.158 (0.134,0.179)     | 40.48  |
| C18:2             | Trans-9, cis-12 octadecadienic acid                                | 0.099±0.124<br>0.146 (0.039,0.234)     | 0.096±0.117<br>0.010 (0.010,0.010)     | 0.066±0.068<br>0.010 (0.010,0.010)     | 0.086±0.08<br>0.017 (0.010,0.058)      | 0.072±0.092<br>0.200 (0.108,0.254)     | 0.063±0.102<br>0.025 (0.01,0.075)      | 121.69 |
| C18:2             | Methyl linoleate (cis-9, cis-12 octadecadienic acid)               | 10.852±2.993<br>9.019 (8.193,12.244)   | 11.666±2.573<br>11.584 (11.208,12.624) | 11.801±3.291<br>11.252 (8.917,14.908)  | 11.804±2.401<br>14.275 (11.461,15.989) | 11.488±3.38<br>10.728 (9.59,12.967)    | 11.757±2.971<br>9.946 (9.033,11.261)   | 25.13  |
| C20:1n9           | Cis-11-eicosenoic acid                                             | 0.433±0.131<br>0.468 (0.4,0.496)       | 0.419±0.096<br>0.378 (0.320,0.431)     | 0.411±0.095<br>0.373 (0.277,0.484)     | 0.374±0.136<br>0.490 (0.406,0.531)     | 0.393±0.107<br>0.341 (0.311,0.380)     | 0.387±0.088<br>0.404 (0.362,0.42)      | 27.23  |
| C21:0             | Methyl heneicosanoate                                              | 0.041±0.036<br>0.017 (0.011,0.032)     | 0.038±0.033<br>0.010 (0.010,0.010)     | 0.033±0.026<br>0.010 (0.010,0.027)     | 0.038±0.049<br>0.044 (0.030,0.075)     | 0.037±0.037<br>0.030 (0.024,0.034)     | 0.032±0.029<br>0.051 (0.035,0.067)     | 96.44  |
| C18:3n6           | Methyl γ-linoleate                                                 | 0.073±0.055<br>0.078 (0.057,0.085)     | 0.061±0.041<br>0.066 (0.016,0.114)     | 0.081±0.049<br>0.118 (0.049,0.135)     | 0.07±0.055<br>0.060 (0.035,0.084)      | 0.065±0.047<br>0.030 (0.010,0.047)     | 0.058±0.046<br>0.039 (0.033,0.061)     | 71.57  |
| C18:2<br>unknown1 |                                                                    | 0.016±0.010<br>0.023 (0.018,0.04)      | 0.021±0.023<br>0.010 (0.010,0.015)     | 0.017±0.012<br>0.010 (0.010,0.026)     | 0.016±0.012<br>0.010 (0.010,0.010)     | 0.018±0.016<br>0.010 (0.010,0.010)     | 0.015±0.011<br>0.01 (0.01,0.01)        | 85.06  |
| C18:2<br>unknown2 |                                                                    | 0.028±0.022<br>0.021 (0.012,0.031)     | 0.027±0.017<br>0.010 (0.010,0.010)     | 0.023±0.016<br>0.026 (0.010,0.043)     | 0.041±0.059<br>0.030 (0.016,0.045)     | 0.03±0.026<br>0.029 (0.026,0.046)      | 0.025±0.024<br>0.01 (0.01,0.023)       | 106.48 |
| C22:0             | Methyl docosanoate                                                 | 1.203±0.498<br>1.084 (0.856,1.298)     | 1.204±0.507<br>1.010 (0.870,1.342)     | 1.365±0.729<br>1.102 (0.964,1.402)     | 1.222±0.495<br>1.467 (0.97,1.633)      | 1.283±0.68<br>1.377 (0.980,1.756)      | 1.218±0.359<br>0.991 (0.726,1.256)     | 43.92  |
| C18:3n3           | Methyl linolenate                                                  | 0.034±0.017<br>0.032 (0.013,0.050)     | 0.039±0.026<br>0.010 (0.010,0.021)     | 0.035±0.024<br>0.022 (0.010,0.045)     | 0.041±0.031<br>0.046 (0.038,0.070)     | 0.039±0.027<br>0.043 (0.029,0.051)     | 0.038±0.021<br>0.038 (0.028,0.048)     | 64.7   |
| C20:2             | Methyl cis,cis 11, 14 eicosadienoate (cis-11,14-eicosadienic acid) | 0.607±0.217<br>0.594 (0.429,0.68)      | 0.608±0.199<br>0.386 (0.301,0.857)     | 0.531±0.184<br>0.447 (0.341,0.514)     | 0.546±0.192<br>0.491 (0.382,0.706)     | 0.582±0.247<br>0.719 (0.629,0.787)     | 0.496±0.213<br>0.6 (0.524,0.737)       | 37.17  |
| C22:1n9           | Methyl erucate                                                     | 0.044±0.027<br>0.029 (0.019,0.096)     | 0.043±0.032<br>0.010 (0.010,0.016)     | 0.044±0.033<br>0.025 (0.010,0.043)     | 0.048±0.034<br>0.064 (0.052,0.076)     | 0.043±0.033<br>0.054 (0.031,0.067)     | 0.034±0.028<br>0.036 (0.021,0.054)     | 72.71  |

|                   |                                         |                                    |                                    |                                    |                                    |                                    |                                    |        |
|-------------------|-----------------------------------------|------------------------------------|------------------------------------|------------------------------------|------------------------------------|------------------------------------|------------------------------------|--------|
| C23:0             | Methyl tricosanoate                     | 0.010±0.001<br>0.010 (0.010,0.010) | 0.010±0.000<br>0.010 (0.010,0.010) | 0.010±0.001<br>0.010 (0.010,0.010) | 0.015±0.023<br>0.010 (0.010,0.010) | 0.02±0.041<br>0.010 (0.010,0.010)  | 0.015±0.02<br>0.01 (0.01,0.01)     | 153.01 |
| C20:3n6           | Cis-8,11,14-eicasatrienioc acid         | 0.341±0.185<br>0.343 (0.298,0.391) | 0.269±0.142<br>0.206 (0.184,0.308) | 0.261±0.113<br>0.264 (0.225,0.358) | 0.242±0.110<br>0.289 (0.249,0.361) | 0.216±0.111<br>0.274 (0.249,0.302) | 0.19±0.12<br>0.01 (0.010,0.145)    | 54.54  |
| C20:3n3           | Cis-11,14,17-eicasatrienioc acid        | 0.045±0.077<br>0.024 (0.020,0.038) | 0.022±0.037<br>0.010 (0.010,0.010) | 0.022±0.033<br>0.010 (0.010,0.010) | 0.026±0.056<br>0.010 (0.010,0.010) | 0.034±0.059<br>0.010 (0.010,0.010) | 0.04±0.085<br>0.08 (0.010,0.201)   | 190.65 |
| C20:4             | Methyl arachidonate                     | 0.327±0.145<br>0.282 (0.249,0.312) | 0.311±0.099<br>0.292 (0.236,0.317) | 0.29±0.126<br>0.317 (0.260,0.394)  | 0.282±0.120<br>0.375 (0.339,0.447) | 0.269±0.14<br>0.363 (0.304,0.396)  | 0.241±0.137<br>0.01 (0.010,0.252)  | 44.94  |
| C24:0             | Methyl tetracosanoate                   | 0.015±0.014<br>0.010 (0.010,0.013) | 0.016±0.011<br>0.010 (0.010,0.010) | 0.012±0.004<br>0.010 (0.010,0.010) | 0.013±0.009<br>0.010 (0.010,0.019) | 0.014±0.010<br>0.010 (0.010,0.011) | 0.013±0.006<br>0.01 (0.010,0.017)  | 68.46  |
| C18:1cis6         | 6-octadecenoic acid                     | 0.012±0.005<br>0.010 (0.010,0.010) | 0.014±0.007<br>0.010 (0.010,0.010) | 0.013±0.007<br>0.010 (0.010,0.010) | 0.013±0.007<br>0.019 (0.010,0.027) | 0.015±0.013<br>0.012 (0.010,0.019) | 0.017±0.012<br>0.011 (0.010,0.017) | 63.09  |
| C22:2n6           | Cis-13,16-docosadienoic acid            | 0.015±0.010<br>0.010 (0.010,0.011) | 0.020±0.012<br>0.010 (0.010,0.010) | 0.014±0.008<br>0.010 (0.010,0.010) | 0.020±0.015<br>0.016 (0.010,0.027) | 0.014±0.007<br>0.019 (0.011,0.026) | 0.013±0.008<br>0.011 (0.010,0.025) | 64.65  |
| C18:2<br>unknown3 |                                         | 0.082±0.052<br>0.077 (0.065,0.115) | 0.089±0.043<br>0.025 (0.010,0.097) | 0.06±0.045<br>0.061 (0.040,0.071)  | 0.055±0.029<br>0.051 (0.014,0.088) | 0.056±0.035<br>0.075 (0.049,0.093) | 0.046±0.029<br>0.059 (0.035,0.067) | 64.32  |
| C24:1n9           | Methyl cis-15-tetracosenoate            | 0.010±0.001<br>0.010 (0.010,0.019) | 0.013±0.006<br>0.010 (0.010,0.010) | 0.013±0.006<br>0.010 (0.010,0.012) | 0.015±0.009<br>0.010 (0.010,0.011) | 0.015±0.011<br>0.011 (0.010,0.013) | 0.011±0.006<br>0.010 (0.010,0.011) | 54.53  |
| C18:1n9           | 9-octadecenoic acid                     | 0.015±0.009<br>0.010 (0.010,0.010) | 0.013±0.007<br>0.010 (0.010,0.010) | 0.012±0.003<br>0.01 (0.010,0.010)  | 0.013±0.005<br>0.015 (0.010,0.020) | 0.011±0.002<br>0.011 (0.010,0.014) | 0.013±0.009<br>0.010 (0.010,0.013) | 50.86  |
| C20:5n3           | Cis 5,8,11,14,17-eicosapentaenoic acid  | 0.085±0.112<br>0.035 (0.023,0.048) | 0.065±0.051<br>0.032 (0.012,0.063) | 0.065±0.054<br>0.07 (0.046,0.080)  | 0.061±0.048<br>0.091 (0.060,0.179) | 0.061±0.056<br>0.056 (0.038,0.132) | 0.052±0.048<br>0.012 (0.01,0.033)  | 99.83  |
| C18:2<br>unknown4 |                                         | 0.036±0.033<br>0.024 (0.017,0.035) | 0.024±0.019<br>0.010 (0.010,0.019) | 0.030±0.023<br>0.022 (0.010,0.026) | 0.029±0.029<br>0.011 (0.010,0.018) | 0.024±0.021<br>0.016 (0.010,0.033) | 0.024±0.02<br>0.029 (0.022,0.07)   | 87.06  |
| C18:1-<br>13E     | Trans-13-octadecenoic acid              | 0.012±0.005<br>0.010 (0.010,0.010) | 0.014±0.014<br>0.010 (0.010,0.010) | 0.014±0.015<br>0.010 (0.010,0.010) | 0.013±0.012<br>0.01 (0.010,0.010)  | 0.016±0.026<br>0.010 (0.010,0.014) | 0.014±0.013<br>0.01 (0.01,0.01)    | 108.77 |
| C22:4n3           | Cis-7,10,13,16-docosatetraenoic acid    | 0.126±0.107<br>0.113 (0.094,0.121) | 0.112±0.065<br>0.088 (0.037,0.147) | 0.105±0.056<br>0.117 (0.08,0.143)  | 0.102±0.065<br>0.132 (0.068,0.202) | 0.111±0.057<br>0.079 (0.023,0.124) | 0.098±0.076<br>0.119 (0.022,0.142) | 66.07  |
| C22:6 n3          | Methyl 4,7,10,13,16,19-docosahexaenoate | 0.225±0.163<br>0.096 (0.077,0.152) | 0.219±0.124 0.08<br>(0.010,0.148)  | 0.205±0.156<br>0.264 (0.209,0.325) | 0.192±0.128<br>0.248 (0.133,0.472) | 0.195±0.181<br>0.187 (0.149,0.360) | 0.145±0.106<br>0.114 (0.101,0.15)  | 73.31  |

**Supplementary Table S4. Significant relationships between human milk fatty acids and maternal intake frequency for eggs, nuts and avocado**

| Fatty acid                                | Food    | p value |
|-------------------------------------------|---------|---------|
| Hexanoic acid (C6:0)                      | Eggs    | 0.041   |
| Decanoic acid (C10:0)                     | Eggs    | 0.02    |
| Dodecanoic acid (C12:0)                   | Eggs    | 0.024   |
| Arachidic acid (C20:0)                    | Eggs    | 0.005   |
| Linoleic acid (C18:2n6)                   | Eggs    | 0.018   |
| Erucic acid (C22:1)                       | Eggs    | 0.008   |
| Eicasatrienoic acid (C20:3n6)             | Eggs    | <0.001  |
| Conjugated linoleic acid unknown 2 C18:2) | Eggs    | <0.001  |
| Eicosapentaenoic acid (C20:5n3)           | Eggs    | 0.001   |
| Docosaheptaenoic acid (C22:6n3)           | Eggs    | 0.003   |
| Dodecanoic acid (C12:0)                   | Nuts    | 0.008   |
| Myristoleic acid (C14:1)                  | Nuts    | 0.016   |
| Octadecanoic acid (C18:0)                 | Nuts    | 0.002   |
| Heneicosanoic acid (C21:0)                | Nuts    | 0.002   |
| $\gamma$ -linolenic acid (C18:3n6)        | Nuts    | <0.001  |
| Decanoic acid (C10:0)                     | Avocado | 0.008   |
| Tridecanoic acid (C13:0)                  | Avocado | 0.03    |
| Tetradecanoic acid (C14:0)                | Avocado | 0.011   |
| Palmitic acid (C16:0)                     | Avocado | 0.042   |
| Octadecanoic acid (C18:0)                 | Avocado | 0.039   |
| Linoleic acid (C18:2n6)                   | Avocado | <0.001  |
| Arachidonic acid (C20:4)                  | Avocado | 0.041   |
| Eicosapentaenoic acid (C20:5n3)           | Avocado | 0.024   |
| Docosaheptaenoic acid (C22:6n3)           | Avocado | 0.002   |

**Supplementary Table S5. Infant fatty acid intake (mg/day) for exclusively breastfeeding infants from months one to six of lactation.** Results are presented as mean $\pm$ SD.

| Fatty acid                                       | Month 1                    | Month 2                    | Month 3                    | Month 4                    | Month 5                   | Month 6                    |
|--------------------------------------------------|----------------------------|----------------------------|----------------------------|----------------------------|---------------------------|----------------------------|
| Hexanoic acid (C6:0)                             | 3.05 $\pm$ 1.08            | 3.43 $\pm$ 1.94            | 3.05 $\pm$ 0.96            | 5.21 $\pm$ 2.31            | 3.87 $\pm$ 2.28           | 4.75 $\pm$ 3.48            |
| Octanoic acid (C8:0)                             | 36.11 $\pm$ 34.26          | 63.88 $\pm$ 48.03          | 58.39 $\pm$ 58.54          | 43.62 $\pm$ 18.11          | 33.98 $\pm$ 24.42         | 30.32 $\pm$ 28.65          |
| Decanoic acid (C10:0)                            | 433.51 $\pm$ 171.64        | 531.9 $\pm$ 222.7          | 607.39 $\pm$ 315.83        | 488.55 $\pm$ 207.61        | 406.15 $\pm$ 148.84       | 441.22 $\pm$ 164.43        |
| Undecanoic acid (C11:0)                          | 2.97 $\pm$ 0.94            | 2.97 $\pm$ 0.94            | 2.97 $\pm$ 0.94            | 2.97 $\pm$ 0.94            | 2.96 $\pm$ 0.95           | 2.97 $\pm$ 0.94            |
| Dodecanoic acid (C12:0)                          | 1436.39 $\pm$ 610.92       | 1395.2 $\pm$ 766.57        | 1484.69 $\pm$ 888.82       | 1431.59 $\pm$ 706.09       | 1189.34 $\pm$ 459.23      | 1325.4 $\pm$ 593.54        |
| Tridecanoic acid (C13:0)                         | 2.97 $\pm$ 0.94            | 2.97 $\pm$ 0.94            | 2.97 $\pm$ 0.94            | 2.97 $\pm$ 0.94            | 3.16 $\pm$ 1.15           | 3.04 $\pm$ 0.95            |
| Tetradecanoic acid (C14:0)                       | 1891.48 $\pm$ 773.42       | 1509.21 $\pm$ 732.67       | 1494.54 $\pm$ 848.22       | 1426.64 $\pm$ 756.66       | 1623.07 $\pm$ 588.94      | 1755.43 $\pm$ 778.38       |
| Pentadecanoic acid (C15:0)                       | 103.67 $\pm$ 57.81         | 78.24 $\pm$ 43.6           | 85.10 $\pm$ 57.44          | 83.9 $\pm$ 61.64           | 139.12 $\pm$ 47.94        | 118.28 $\pm$ 46.46         |
| Myristoleic acid (C14:1)                         | 62.97 $\pm$ 44.49          | 52 $\pm$ 29.93             | 56.40 $\pm$ 46.72          | 70.5 $\pm$ 70.49           | 95.02 $\pm$ 34.29         | 91.35 $\pm$ 38.2           |
| Palmitic acid (C16:0)                            | 6646.47 $\pm$ 2013.9<br>2  | 6330.91 $\pm$ 1980.6<br>7  | 6599.5 $\pm$ 2216.91       | 5491.69 $\pm$ 2138.6<br>7  | 6825.61 $\pm$ 2342.2<br>7 | 6711.43 $\pm$ 2091.3<br>6  |
| Cis-10-pentadecanoic acid (C15:1)                | 2.97 $\pm$ 0.94            | 2.97 $\pm$ 0.94            | 2.97 $\pm$ 0.94            | 2.97 $\pm$ 0.94            | 2.97 $\pm$ 0.94           | 2.97 $\pm$ 0.94            |
| 7-hexadecanoic acid (C16:1)                      | 145.25 $\pm$ 101.61        | 102.16 $\pm$ 48.09         | 93.88 $\pm$ 42.32          | 143.26 $\pm$ 59.52         | 153.91 $\pm$ 44.2         | 150.08 $\pm$ 51.56         |
| Heptadecanoic acid (C17:0)                       | 907.69 $\pm$ 346.66        | 739.97 $\pm$ 217.88        | 781.32 $\pm$ 343.37        | 772.87 $\pm$ 379.63        | 815.67 $\pm$ 236.7        | 921.28 $\pm$ 363.25        |
| Octadecanoic acid (C18:0)                        | 2439.46 $\pm$ 929.96       | 2258.24 $\pm$ 888.31       | 2104.78 $\pm$ 589.01       | 2114.45 $\pm$ 932.96       | 2286.16 $\pm$ 1000.9<br>1 | 2110.78 $\pm$ 639.81       |
| Elaidic acid (C18:1n9t)                          | 187.32 $\pm$ 122.85        | 112.08 $\pm$ 98.46         | 119.40 $\pm$ 73.77         | 176.22 $\pm$ 141.6         | 291.52 $\pm$ 134.99       | 267.89 $\pm$ 118.26        |
| Cis-9-octadecanoic acid (C18:1n9c)               | 10744.83 $\pm$ 3637.<br>14 | 11486.18 $\pm$ 3472.<br>41 | 11185.02 $\pm$ 3468.<br>93 | 11373.13 $\pm$ 3937.<br>07 | 10748.1 $\pm$ 3711.9<br>9 | 11162.07 $\pm$ 4019.<br>56 |
| 11-octadecanoic acid (C18:1n7c)                  | 492.22 $\pm$ 247.34        | 523.2 $\pm$ 180.3          | 514.03 $\pm$ 180.5         | 547.79 $\pm$ 197.67        | 449.34 $\pm$ 235.14       | 565.43 $\pm$ 224.76        |
| Trans-9, trans-12 octadecadienic acid (C18:2n6t) | 19.26 $\pm$ 16.87          | 6.96 $\pm$ 6.71            | 10.93 $\pm$ 8.31           | 22.23 $\pm$ 15.49          | 31.77 $\pm$ 10.23         | 33.18 $\pm$ 11.85          |



|                                                           |                |                     |                     |                     |                |                     |
|-----------------------------------------------------------|----------------|---------------------|---------------------|---------------------|----------------|---------------------|
| <b>Cis-9, trans-12 octadecadienic acid (C18:2)</b>        | 15.58±12.75    | 5.27±4.42           | 12.26±9.75          | 27.5±22.62          | 32.75±15.47    | 43.39±24.27         |
| <b>Arachidic acid (C20:0)</b>                             | 60.22±42.57    | 73.43±48.59         | 76.55±22.3          | 75.77±40.62         | 49.73±18.88    | 44.21±13.96         |
| <b>Trans-9, cis-12 octadecadienic acid (C18:2)</b>        | 49.34±39.18    | 7.97±15.10          | 2.97±0.94           | 12.85±15.81         | 58.16±34.04    | 17.23±23.22         |
| <b>Cis-9, cis-12 octadecadienic acid linoleic (C18:2)</b> | 2988.18±1135.6 | 3492.29±1058.6<br>8 | 3420.25±1331.1<br>1 | 4182.32±1577.5<br>5 | 3315.2±1244.81 | 3052.88±1093.2<br>1 |
| <b>Cis-11-eicosenoic acid (C20:1n9)</b>                   | 138.71±66.10   | 116.54±51.92        | 106.52±39.5         | 141.61±52.5         | 104.19±58.28   | 116.39±42.03        |
| <b>Heneicosanoic acid (C21:0)</b>                         | 9.98±14.65     | 3.78±2.1            | 5.56±3.47           | 16.56±9.48          | 11.78±11.05    | 16.08±8.44          |
| <b>γ-linoleic acid (C18:3n6)</b>                          | 24.67±16.41    | 21.44±18.43         | 29.58±18.45         | 21.44±18.04         | 11.16±10.82    | 14.16±8.31          |
| <b>CLA unknown 1 (C18:2)</b>                              | 8.80±5.54      | 5.57±6.61           | 6.62±5.82           | 3.68±2.2            | 2.97±0.94      | 3.05±0.91           |
| <b>CLA unknown 2 (C18:2)</b>                              | 10.81±17.73    | 6.23±9.5            | 8.86±7.43           | 10.2±7.79           | 11.67±9.76     | 5.63±4.42           |
| <b>Docosanoic acid (C22:0)</b>                            | 328.2±143.12   | 401.95±303.68       | 357.26±176.48       | 428.38±196.41       | 421.51±194.41  | 286.99±133.56       |
| <b>Linolenic acid (C18:3n3)</b>                           | 11.72±9.46     | 5.89±5.07           | 8.19±6.44           | 17.11±10.07         | 13.90±9.43     | 11.58±5.1           |
| <b>Cis-11, cis-14 eicosadienoic acid (C20:2)</b>          | 175.8±86.04    | 166.06±119.01       | 129.87±57.24        | 156.03±79.63        | 202.37±62.42   | 177.95±70.63        |
| <b>Tricosanoic acid (C23:0)</b>                           | 16.11±14.91    | 4.90±4.36           | 10.04±8.73          | 19.45±10.55         | 16.72±11.52    | 12.75±8.91          |
| <b>Cis-8,11,14-eicasatrienoic acid (C20:3n6)</b>          | 4.58±6.91      | 2.97±0.94           | 2.97±0.94           | 3.18±1.49           | 3.08±0.96      | 6.55±10.42          |
| <b>Cis-11,14,17-eicasatrienoic acid (C20:3n3)</b>         | 108.14±52.55   | 78.32±50.81         | 80.94±42.22         | 92.86±63.85         | 79.74±29.58    | 28.41±41.1          |
| <b>cis-11,14,17-eicasatrienioc acid ME C20:3N3</b>        | 9.59±6.99      | 3.65±2.26           | 2.95±0.95           | 3.84±3.47           | 2.97±0.94      | 34.97±41.97         |
| <b>Arachidonic acid (C20:4)</b>                           | 82.87±30.56    | 82.49±31.62         | 97.98±41.37         | 115.44±64.6         | 106.78±38.22   | 31.88±40.64         |
| <b>Tetracosanoic acid (C24:0)</b>                         | 4.80±4.72      | 2.97±0.94           | 3.56±1.75           | 4.41±2.56           | 4.22±3.31      | 4.12±2.07           |
| <b>6-octadecanoic acid (C18:1cis6)</b>                    | 3.20±1.53      | 2.97±0.94           | 3.04±0.84           | 6.70±5.28           | 4.88±4.03      | 4.51±2.42           |
| <b>Cis-13,16-docosadienoic acid (C22:2n6)</b>             | 3.35±1.28      | 2.97±0.94           | 4.04±2.39           | 6.14±3.89           | 6.59±4.66      | 5.58±4.29           |

|                                                        |                  |                  |                  |                  |                  |                  |
|--------------------------------------------------------|------------------|------------------|------------------|------------------|------------------|------------------|
| <b>CLA unknown 3 (C18:2)</b>                           | 27.6±16.75       | 18.12±21.9       | 17.11±9.42       | 17.42±13.96      | 21.59±14.26      | 18.03±13.56      |
| <b>Cis-15-tetracosanoic acid (C24:1n9)</b>             | 5.10±4.32        | 2.97±0.94        | 4.16±2.26        | 3.68±1.97        | 3.78±1.81        | 3.52±1.48        |
| <b>9-octadecanoic acid (C18:1n9)</b>                   | 3.27±1.51        | 2.97±0.94        | 3.19±1.12        | 5.42±4.27        | 3.98±2.28        | 4.46±3.35        |
| <b>Cis-5,8,11,14,17-eicosapentanoic acid (C20:5n3)</b> | 10.73±6.76       | 15.37±17.37      | 19.44±10.32      | 33.30±23.78      | 30.47±31.98      | 6.93±5.79        |
| <b>CLA unknown 4 (C18:2)</b>                           | 8.39±5.96        | 7.55±12.10       | 8.31±7.71        | 6.97±10.46       | 6.28±4.19        | 14.74±11.66      |
| <b>Trans-13-octadecenoic acid (C18:1-13E)</b>          | 4.63±4.87        | 2.97±0.94        | 4.33±5.48        | 3.17±1.41        | 5.3±7.77         | 3.89±3.94        |
| <b>Cis-7,10,13,16-docosatetraenoic acid (C22:6n3)</b>  | 34.62±17.51      | 31.29±27.77      | 34.78±20.58      | 37.1±21.3        | 27.85±30.95      | 29.08±24.77      |
| <b>Docosahexaenoic acid (C22:6)</b>                    | 38.53±30.49      | 33.23±36.98      | 76.8±34.18       | 82.72±57.6       | 73.41±49.54      | 40.73±24.22      |
| <b>AA:DHA</b>                                          | 3.25±2.18        | 8.97±9.37        | 1.31±0.29        | 2.22±2.16        | 1.83±0.93        | 0.77±1.01        |
| <b>Total n-6</b>                                       | 3.23±1.23        | 3.69±1.12        | 3.65±1.41        | 4.45±1.69        | 3.56±1.30        | 3.17±1.13        |
| <b>Total n-3</b>                                       | 0.11±0.06        | 0.09±0.08        | 0.14±0.06        | 0.17±0.09        | 0.15±0.11        | 0.12±0.06        |
| <b>n-6:n-3 ratio</b>                                   | 40.11±32.31      | 84.50±83.29      | 26.79±7.33       | 30.42±16.89      | 30.02±12.05      | 31.54±22.92      |
| <b>Total saturated</b>                                 | 14311.55±4676.92 | 13402.02±4719.64 | 13670.59±5030.53 | 12392.75±4505.37 | 13819.4±4551.55  | 13782.84±4287.39 |
| <b>Total unsaturated</b>                               | 15434.60±5056.83 | 16402.58±4924.77 | 16074.87±5026.45 | 17343.03±5791.15 | 15915.34±5346.62 | 15954.69±5492.28 |
| <b>Total monounsaturated</b>                           | 11806.60±3924.53 | 12411.91±3770.85 | 12102.99±3737.2  | 12493.9±4179.04  | 11879.71±4031.52 | 12385.3±4393.09  |
| <b>Total polyunsaturated</b>                           | 3628.00±1381.68  | 3990.67±1248.94  | 3971.88±1496.58  | 4849.14±1721.17  | 4035.63±1450.49  | 3569.39±1228.07  |
